# Supplementary material for: Mindfulness and Social-Emotional Competencies: Proposing Connections Through a Review of the Research
Source: Springer Nature journal article supplement (doi:10.1007/s12671-019-01101-1), 2019-04-26
Supplement: MOESM1 [file 16681570]

**Supplementary Materials**

*Measures and tools used to assess constructs coded*

| SEL Domain | Assessment/Measure Used |
| --- | --- |
| Self-Awareness | Student interview  Emotional Awareness Questionnaire  Differential Emotions Scale  Difficulties in Emotion Regulation Scale  Statements made by students  Concept mapping  Mindful Attention Awareness Scale  Cognitive and Affective Mindfulness Scale-Revised  Adaptation from Mindfulness Attention Awareness Scale and Freiburg Mindfulness Inventory  Open-ended interviews  Study-tailored questions  Child Acceptance and Mindfulness Measure  Scales of Psychological Well-being  Perceived Competence for Learning Scale  Affective Self-Regulatory Efficacy Scale  Marsh’s Self Concept Questionnaire  Self-portrait drawings  Rosenberg Self-Esteem Scale  Global Self-Worth subscale of the Self-Perception Profile for Children  Self-Compassion Scale  Resiliency Inventory  Inventory of Positive Psychological Attitudes-32R |
| Self-Management | Child Acceptance and Mindfulness Measure  Difficulties in Emotion Regulation Scale  Adaptation from Mindfulness Attention Awareness Scale and Freiburg Mindfulness Inventory  Teacher Social Competence Scale  Student Interview  Feely Faces Scales  Profile of Mood States  Positive and Negative Affect Schedule  Smiley Face Emotions Evaluation  Beck Youth Inventories  Differential Emotions Scale  State-Trait Anger Expression Inventory  Profile of Mood State-Short Form  Symptom Check List 90-R  Cood-Medley Hostility Inventory  Spence Children’s Anxiety Scale  Children’s Behavior Checklist  The Multidimentional Anxiety Scale for Children  State-Trait Anxiety Inventory  Avoidance and Fusion Questionnaire for Youth  Patient Health Questionnaire-9  Children’s Depression Inventory  Center for Epidemiologic Studies Depression Scale for Children  Depression Anxiety Stress Scales  The Short Mood and Feelings Questionnaire-Child Version  Youth Outcome Questionnaire  Seattle Personality Questionnaire for Children  The Emotion Profile Inventory  Open-ended interviews  Subjective statements made by students  Concept Mapping  The Responses to Stress Questionnaire  Behavior Rating Inventory of Executive Function  Subscale of the Resiliency Inventory  Strengths and Difficulties Questionnaire  Student Internalizing Symptoms  Study tailored questions  Perceived Stress Scale  Stress Survey Scale  Feel Bad Scale  Somatization Index of the Child Behavior Checklist  Psychosomatic Complaints Scale  Social Competence Scale  Subscale of Teacher’s Rating Scale of Social-Emotional Competence  Study-tailored questions  Observation  Subscale of Teacher’s Rating Scale of Social-Emotional Competence  Child Behavior Checklist  Leiter, drawing task of sustained attention  Children’s Behavior Questionnaire  Connor's Teacher Rating Scale-Revised  Student Behavior Rubric  Profile of Mood State-Short Form  Dimensional change card sort task from the NIH Toolbox Cognitive Function Battery  Toy Wait Task  Toy Wrap Task  Behavior Rating Inventory of Executive Function  Flanker Fish Task  Hearts and Flowers version of the Dots Task  Pencil Tapping Task  Head Shoulders Knees and Toes  The Responses to Stress Questionnaire  Ruminative Response Scale  Children’s Rejection Sensitivity Measure  Youth Outcome Questionnaire  Subscale of Teacher’s Rating Scale of Social-Emotional Competence  Peer nominations  Connor's Teacher Rating Scale-Revised  Strengths and Difficulties Questionnaire  Principal visits, calls home, suspension, red cards  Pencipe and Zelazo procedure  Academic Competence Evaluation  Social Competence Scale  Profile of Mood State-Short Form  Behavior Assessment Scale for Children-2  The Responses to Stress Questionnaire  Teen Conflict Survey  Social Skills Rating System Behavior  The Child Behavior Checklist  Adolescent Self-Regulatory Inventory  Student Behavior Rubric  Self-Control Rating Scale  Study tailored measure  Mindful Thinking and Action Scale for Adolescents  Subscale of the Behavioral and Emotional Rating Scale  Schoolagers’ Coping Strategies Inventory  COPE (negative coping)  COPE (positive coping)  Curiosity and Exploration Inventory  Behavioral and Emotional Rating Scale  Profile of Mood State-Short Form  Warwick Edinburgh Mental Well-being Scale  Scales of Psychological Well-being  Subjective statements made by students  Ego-Resiliency Scale  Resilience Scale  Behavioral & Emotional Rating Scale |
| Social Awareness | Subscale of the Interpersonal Reactivity Index  Peer nominations  Subjective statements made by students |
| Relationship Skills | Teacher assigned grades  Student Behavior Rubric  Sharing task  Peer nominations  Subscale of Behavioral and Emotional Rating Scale  Student Behavior Rubric  Study-tailored questions  Strengths and Difficulties Questionnaire  Scales of Psychological Well-being  People in My Life  Survey question  Social Competence Scale  Behavioral and Emotional Rating Scale  Peer nominations  Teacher assigned evaluations  Social Skills Rating System  Children’s Behavior Checklist  Youth Outcome Questionnaire  Peer nominations |
| Responsible Decision Making | Social Competence Scale  Intentions to Use Alcohol and Tobacco Scale  Children’s Coping Strategies Checklist  Academic Competence Evaluation Scales  Social Goals Questionnaire  Peer nominations |
